# Supplementary material
Source: PubMed Central journal article supplement (PMC6589062)
Supplement: IAI.00865-18-s0001.pdf [file IAI.00865-18-s0001.pdf]

# Supplemental Figure 2

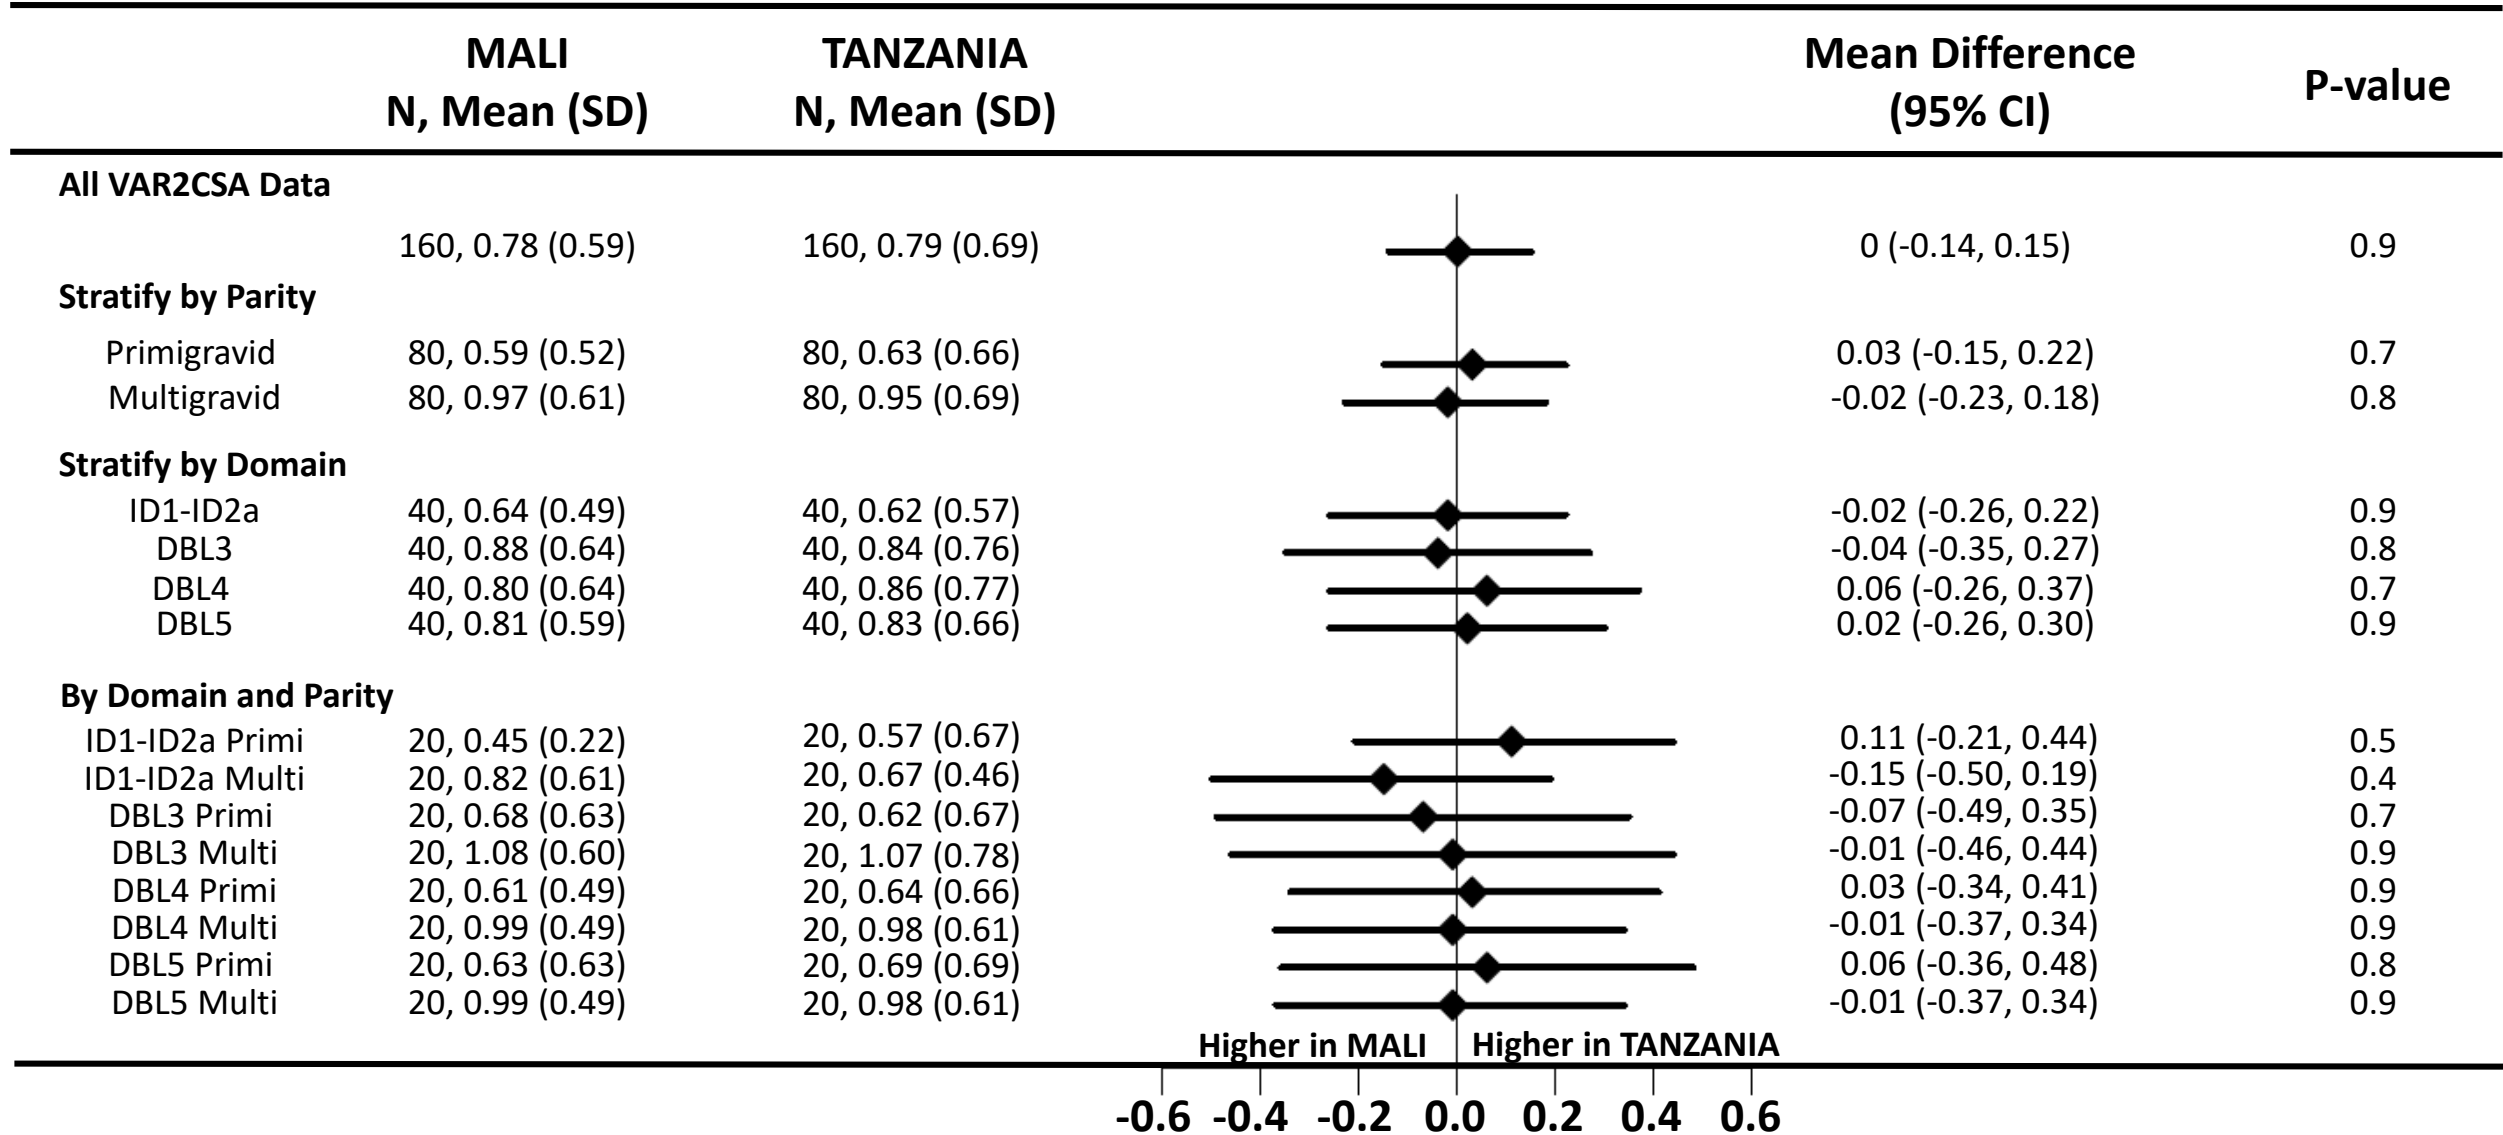

# Supplemental Figure 3

**A**

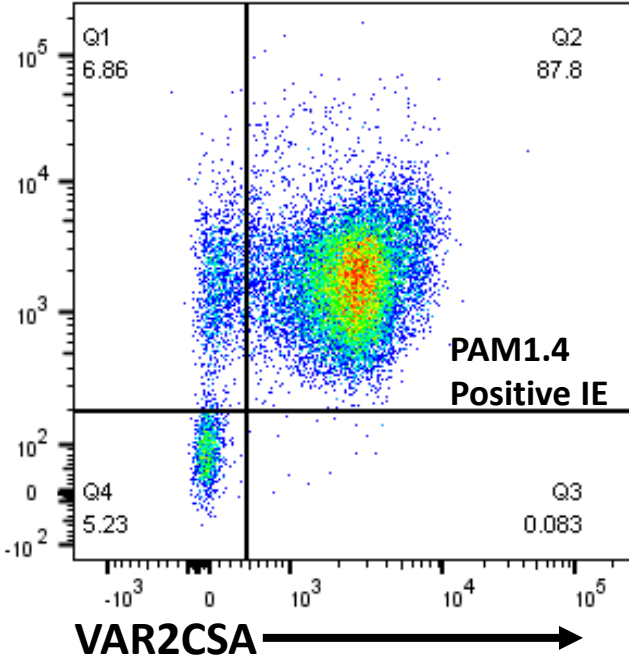

**B**

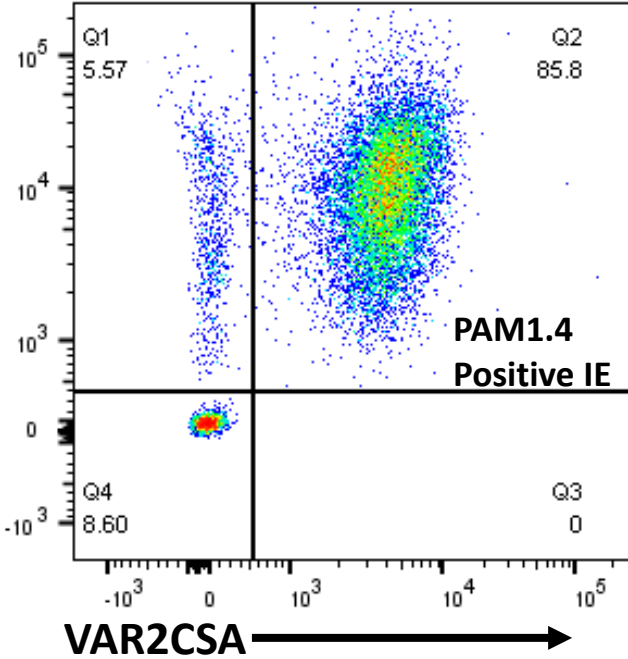

# Supplemental Figure 4

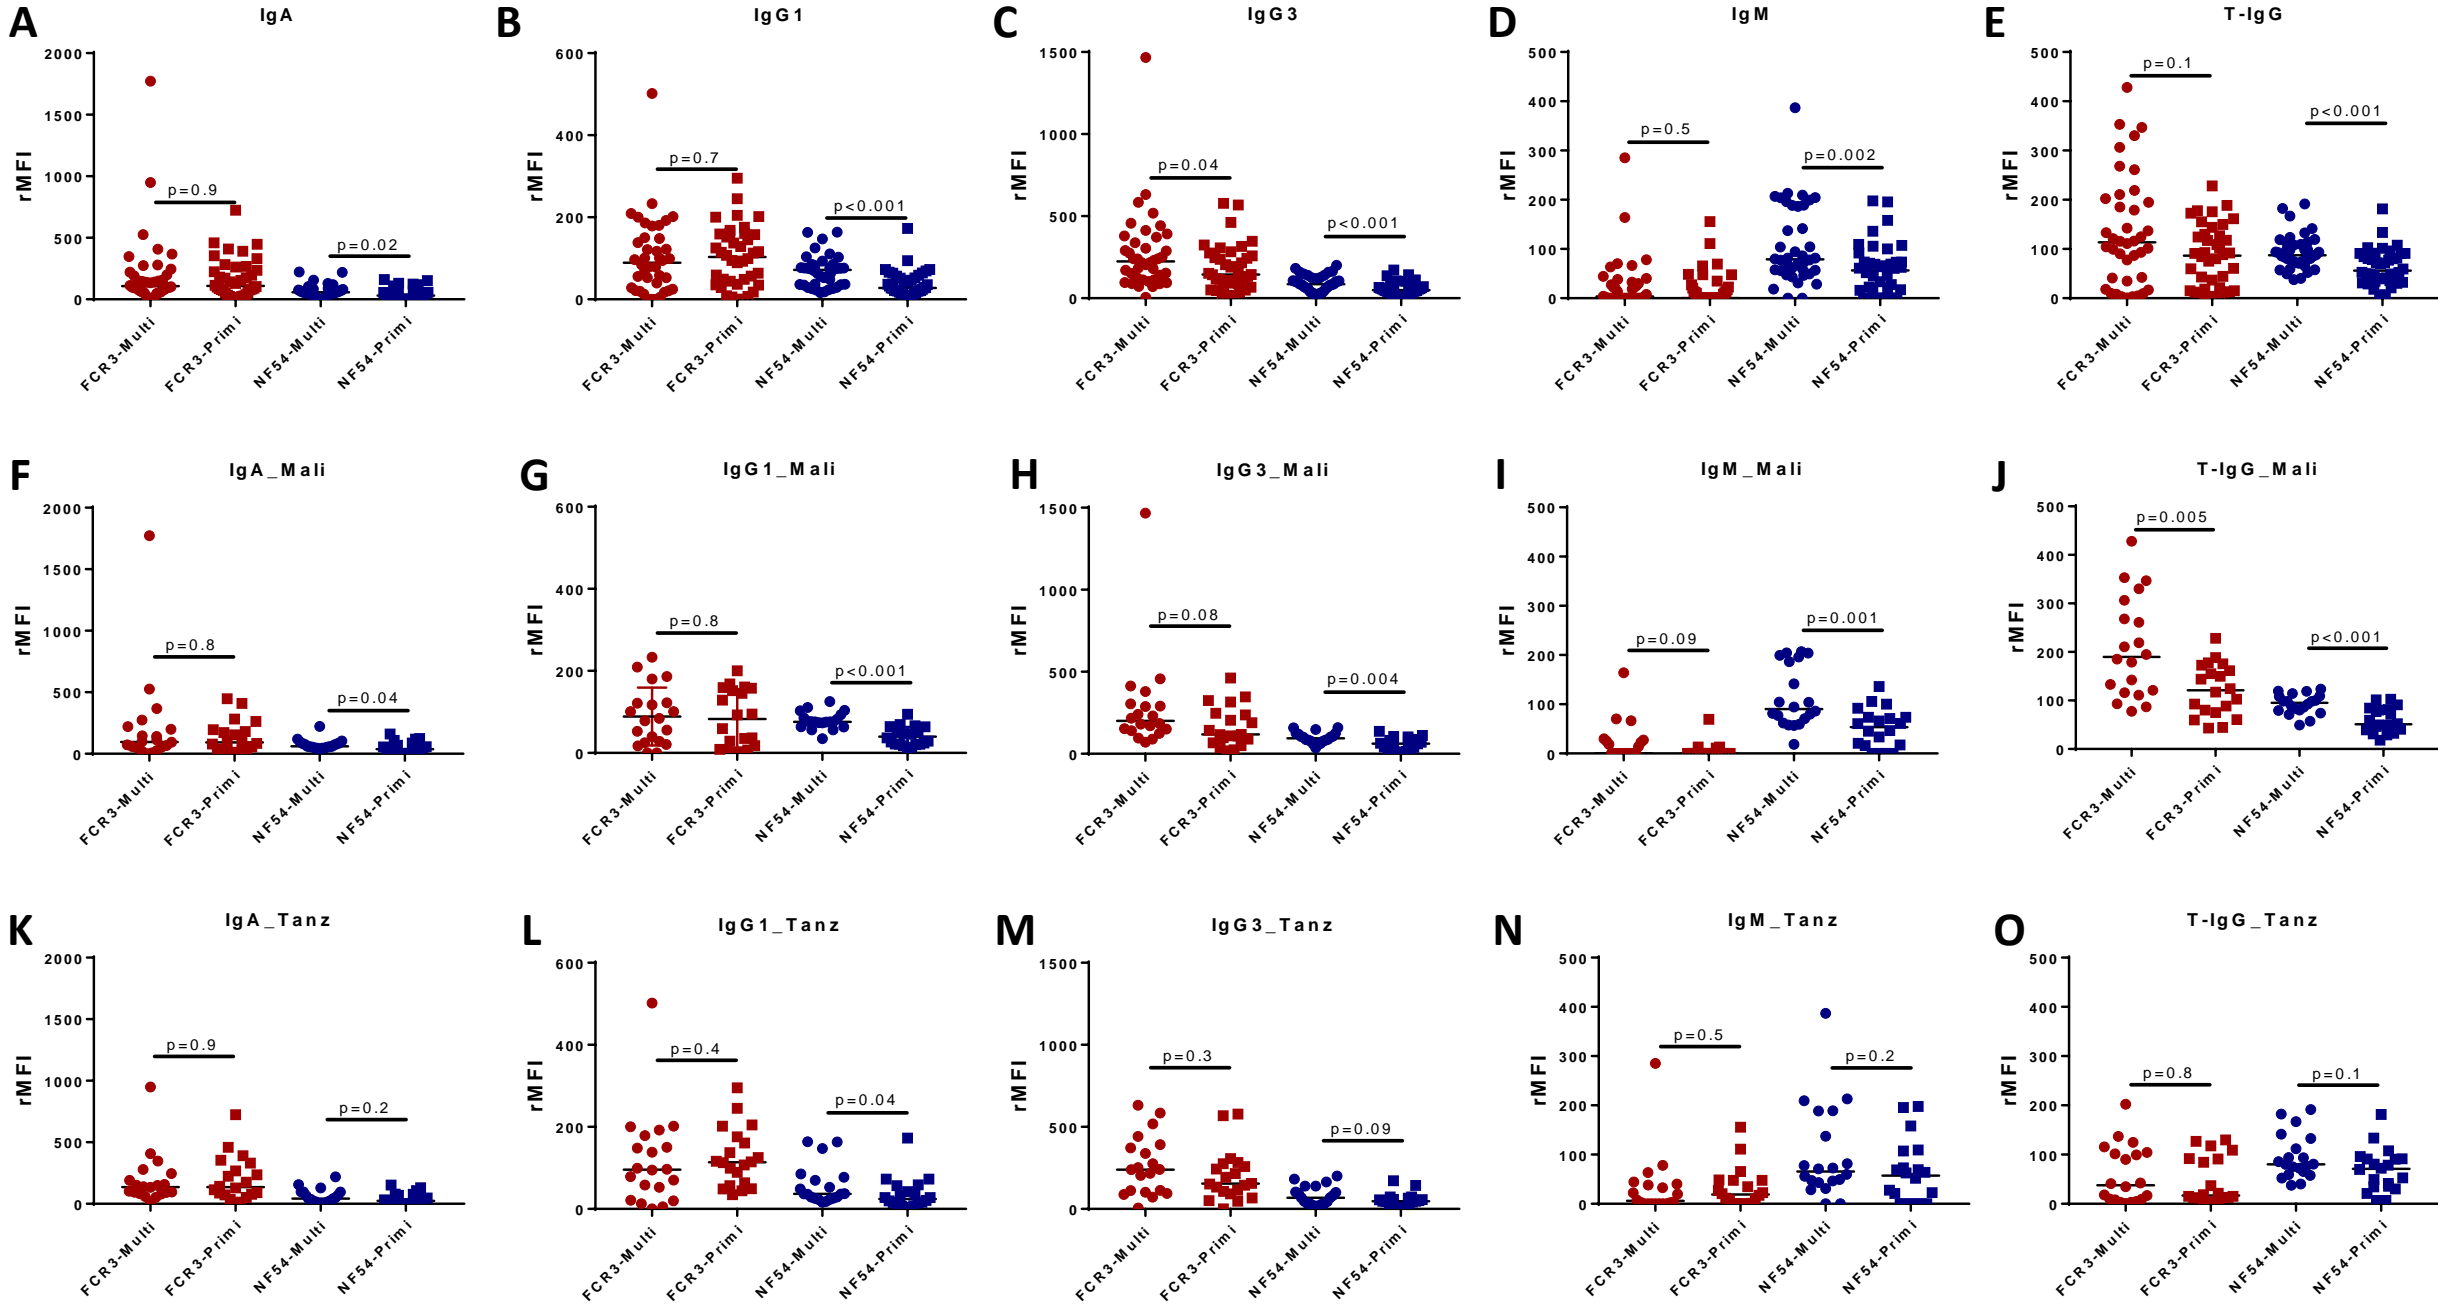

# Supplemental Figure 5

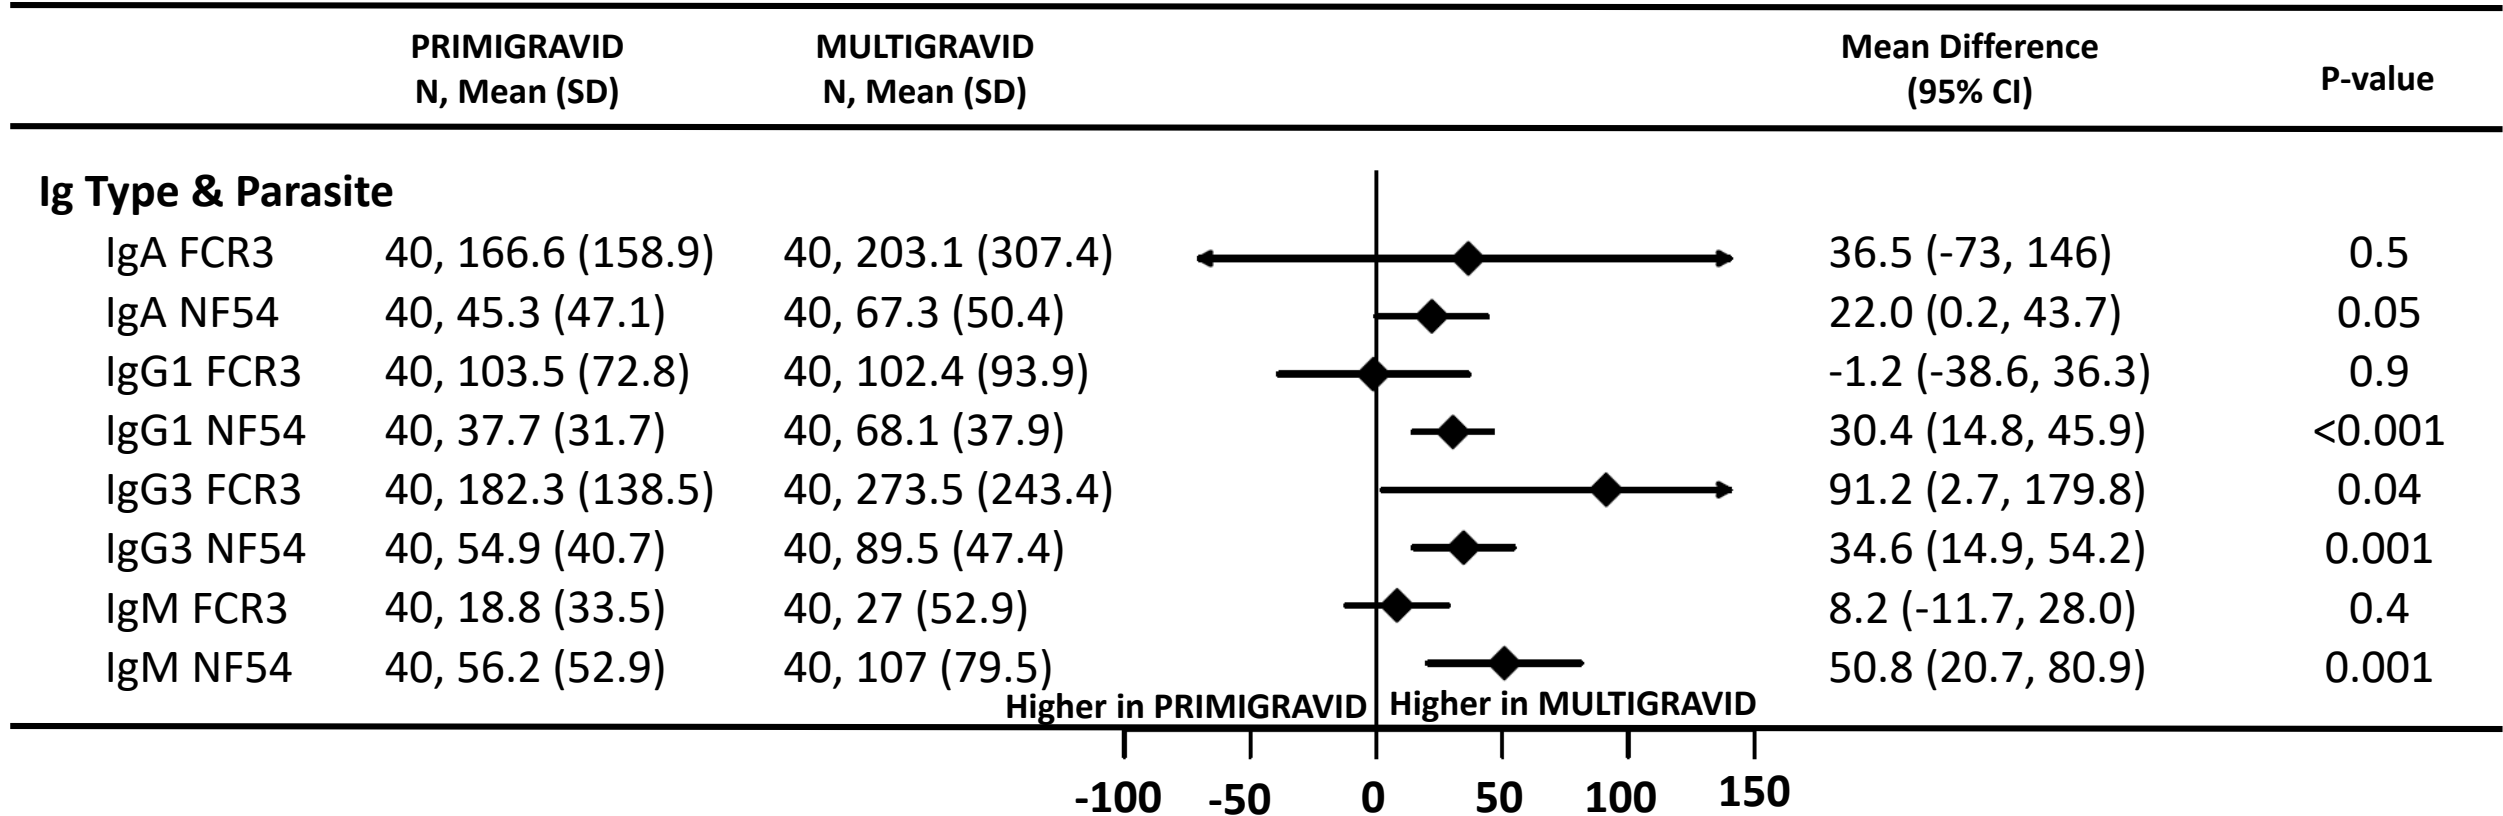

# Supplemental Figure 6

## A. Comparison of Binding Inhibition: by Parity

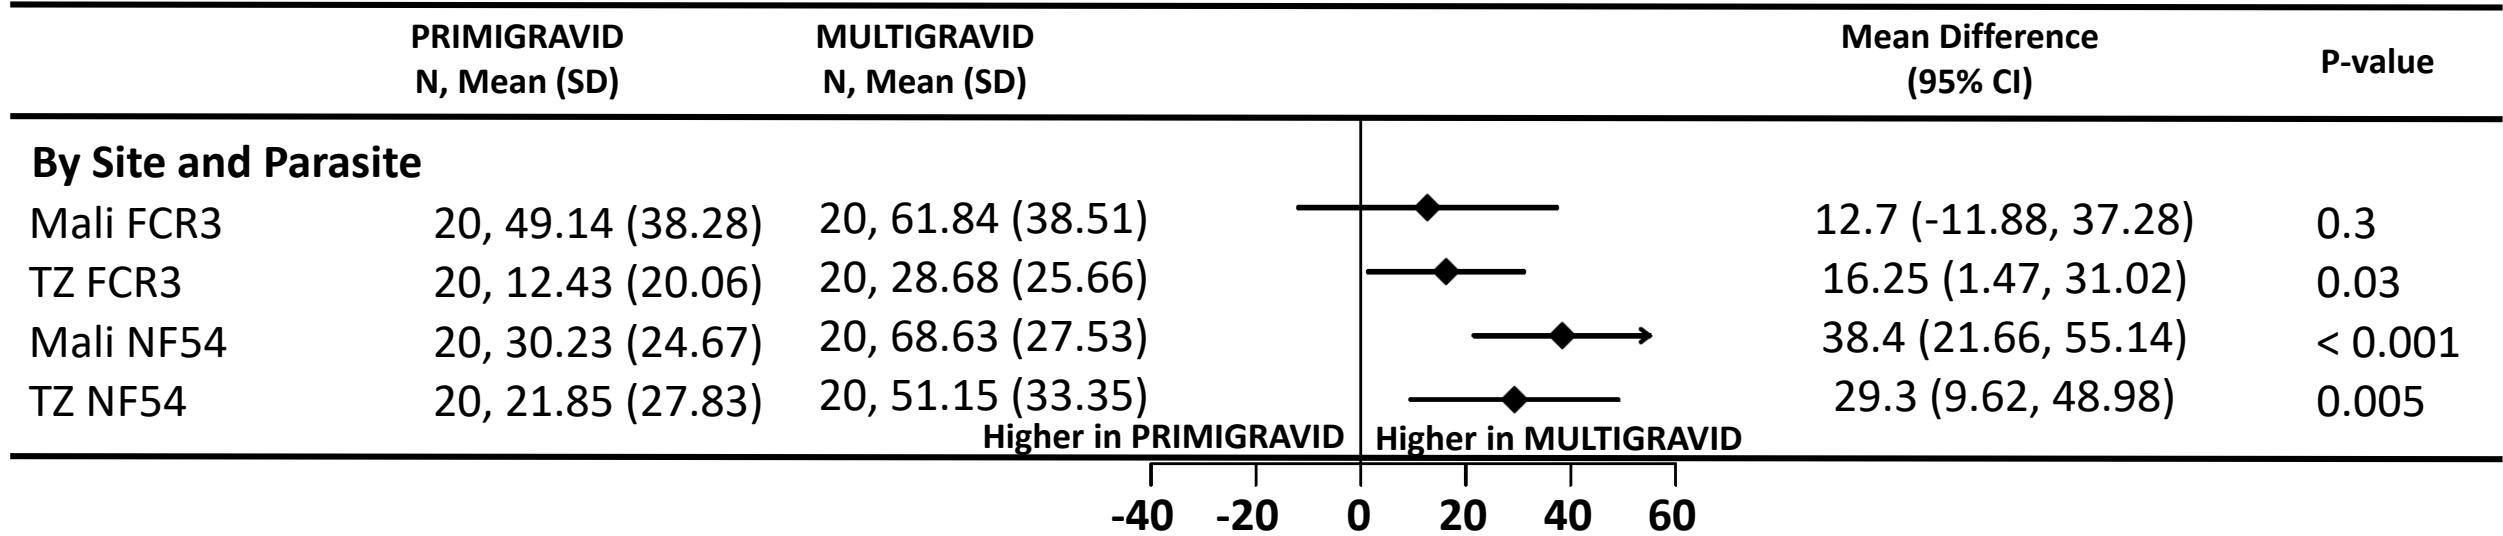

## B. Comparison of Opsonizing Activity: by Parity

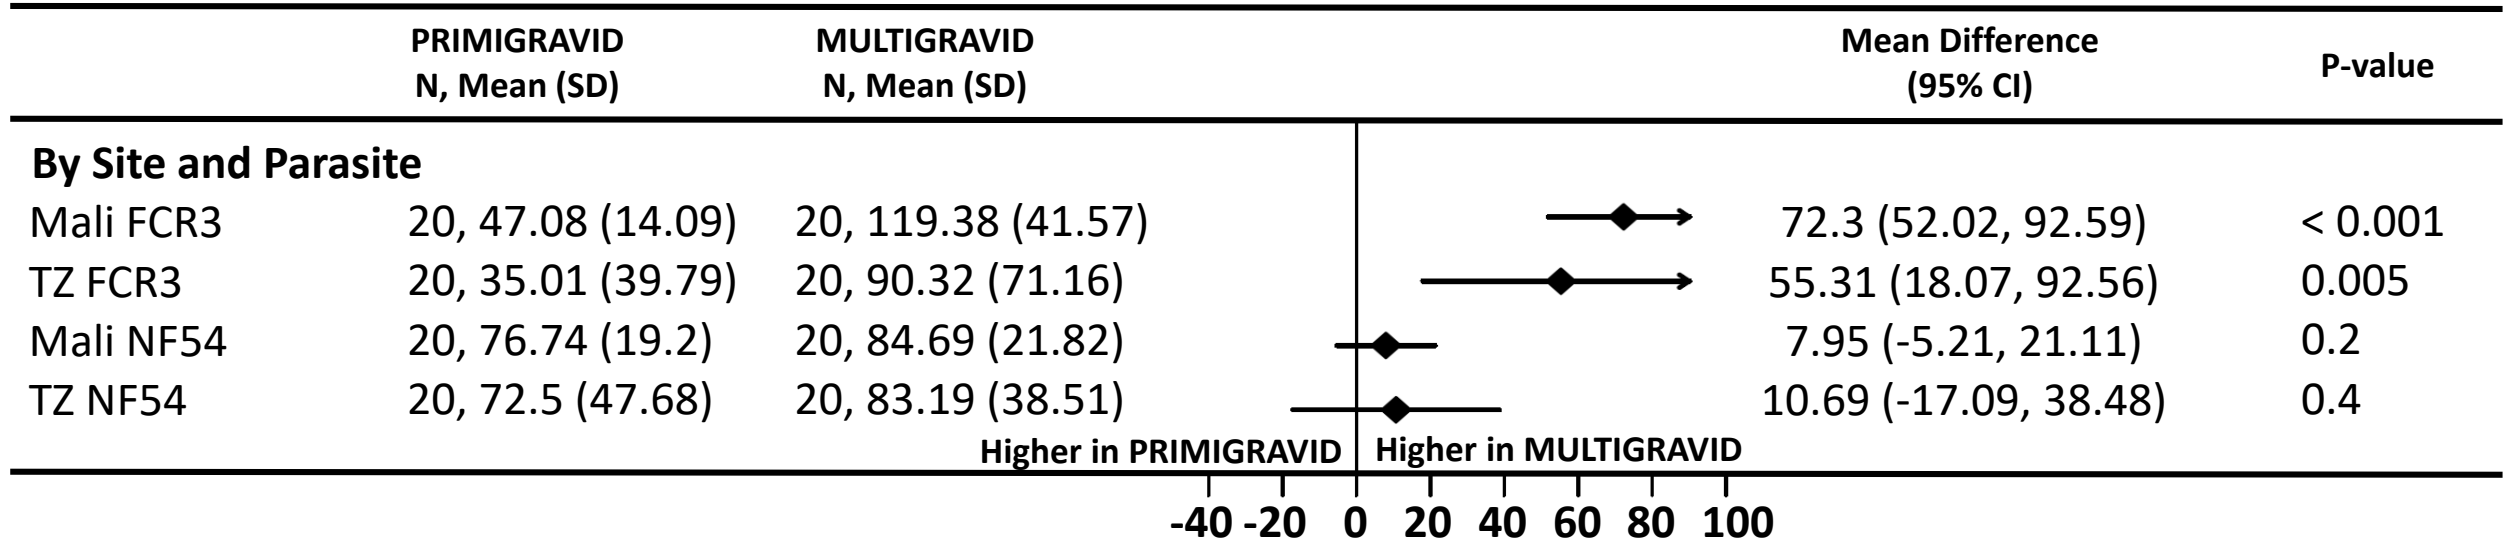

# Supplemental Figure 7

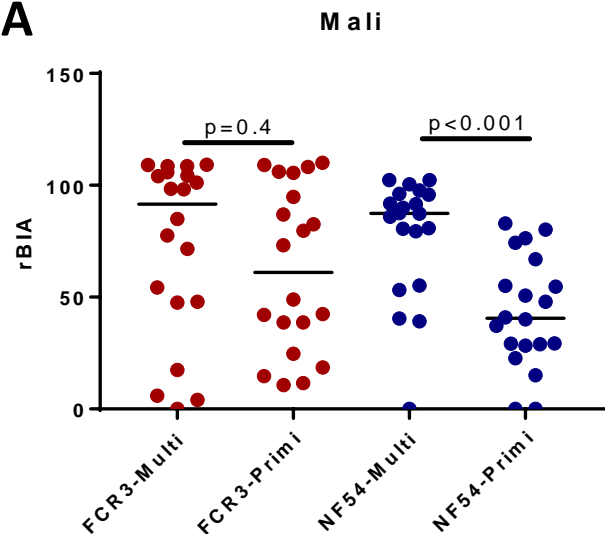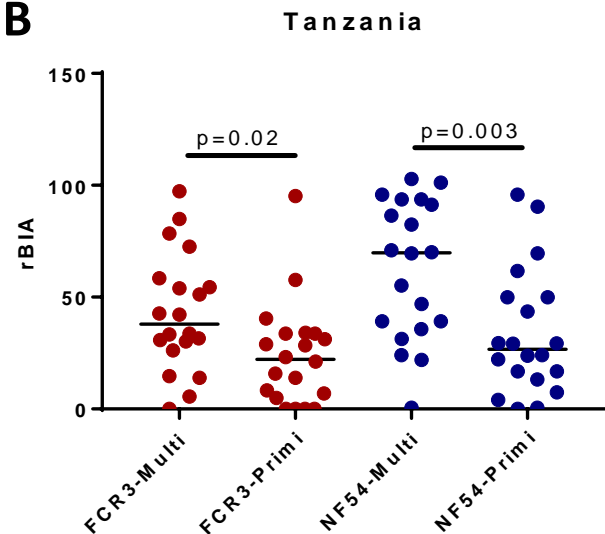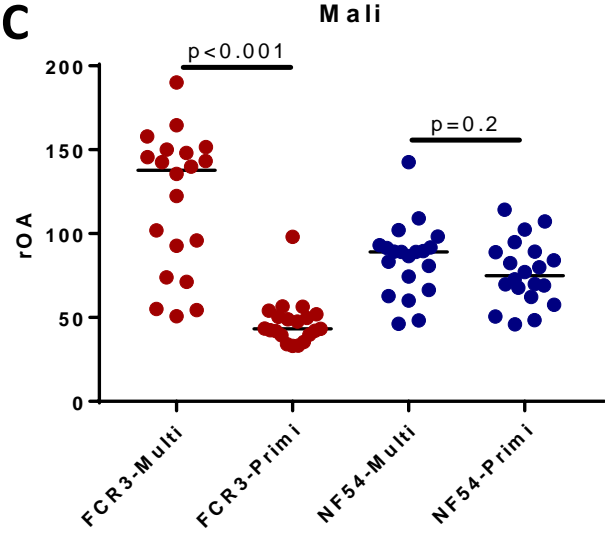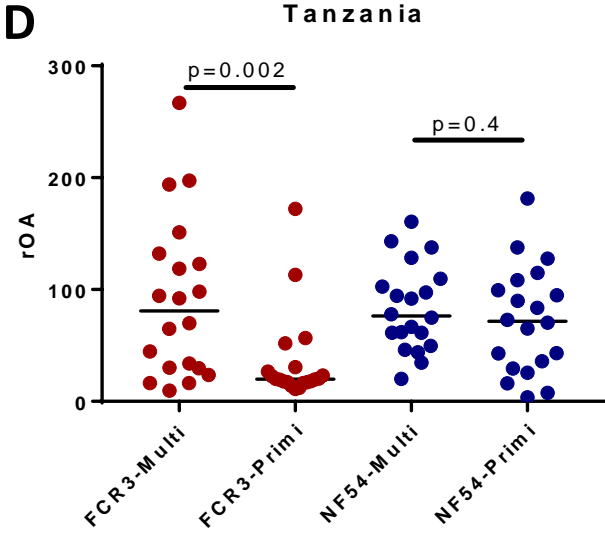

# Supplemental Figure 8

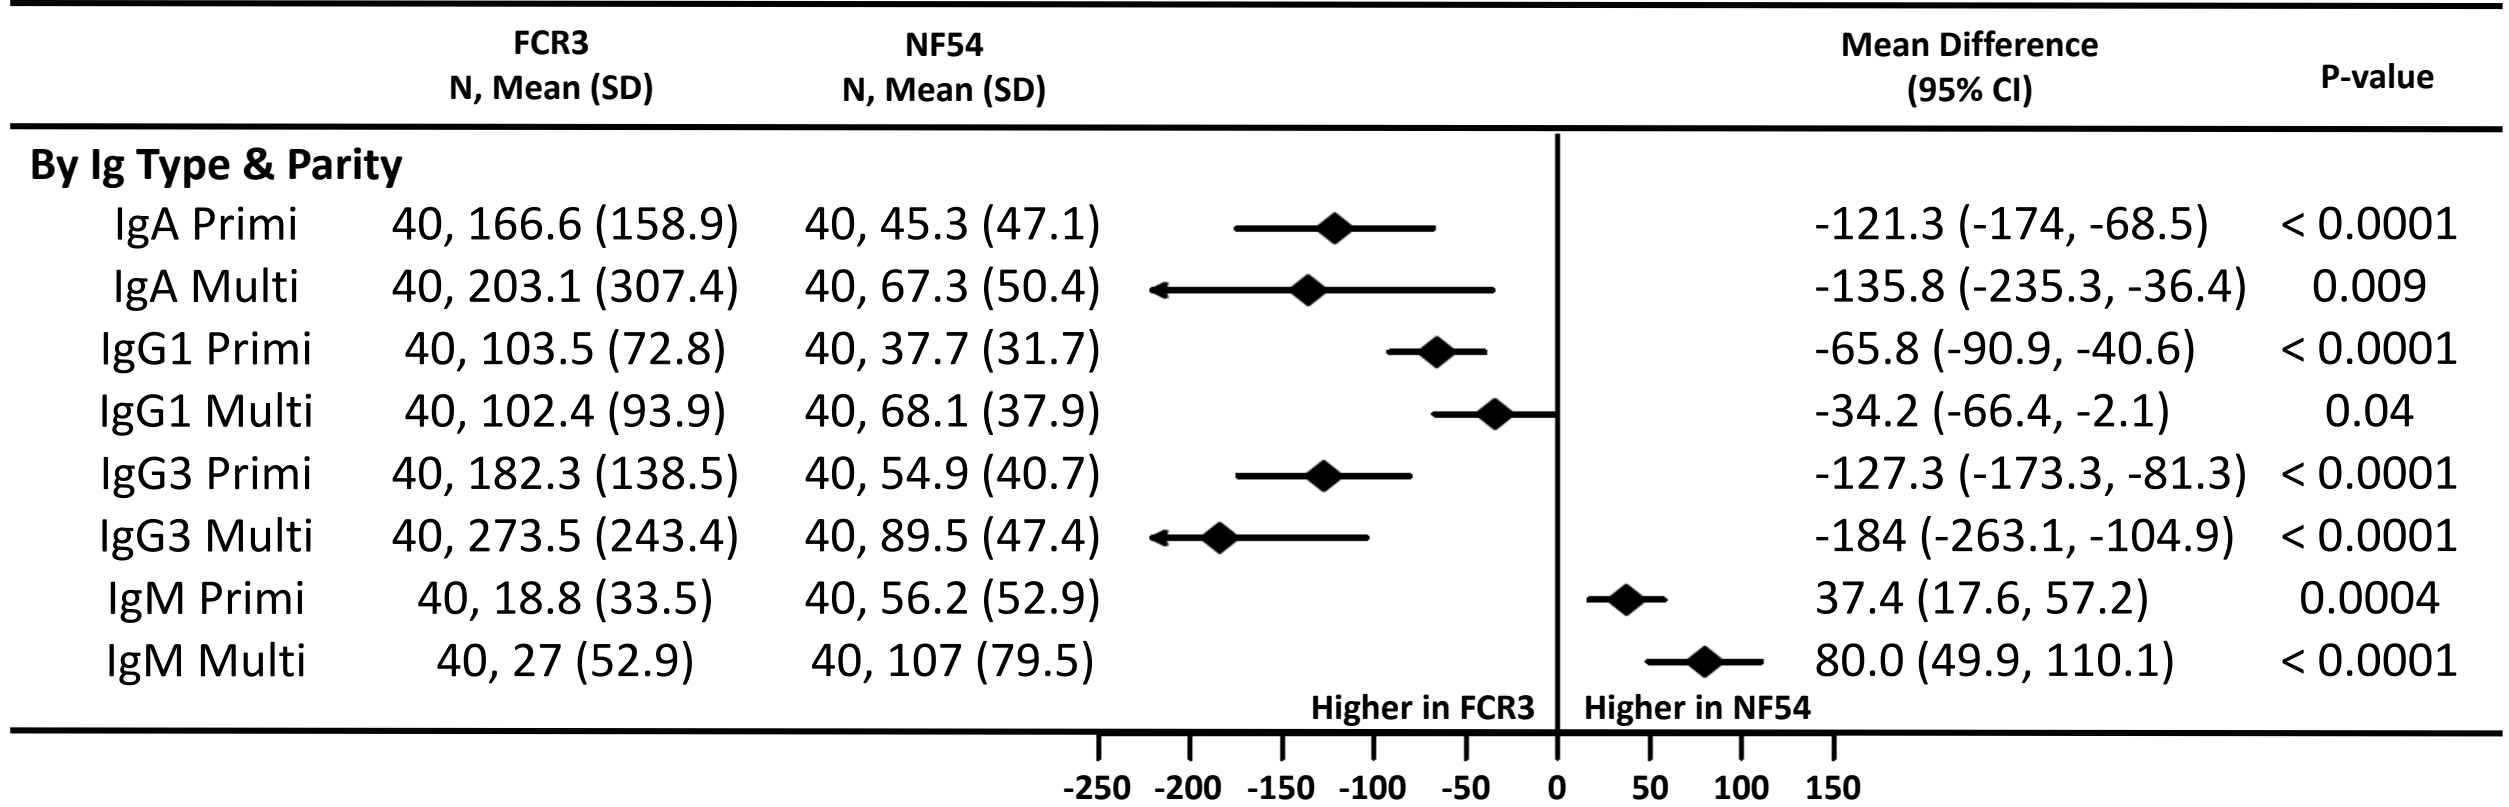



# Supplemental Figure 9

## A. Comparison of Binding Inhibition

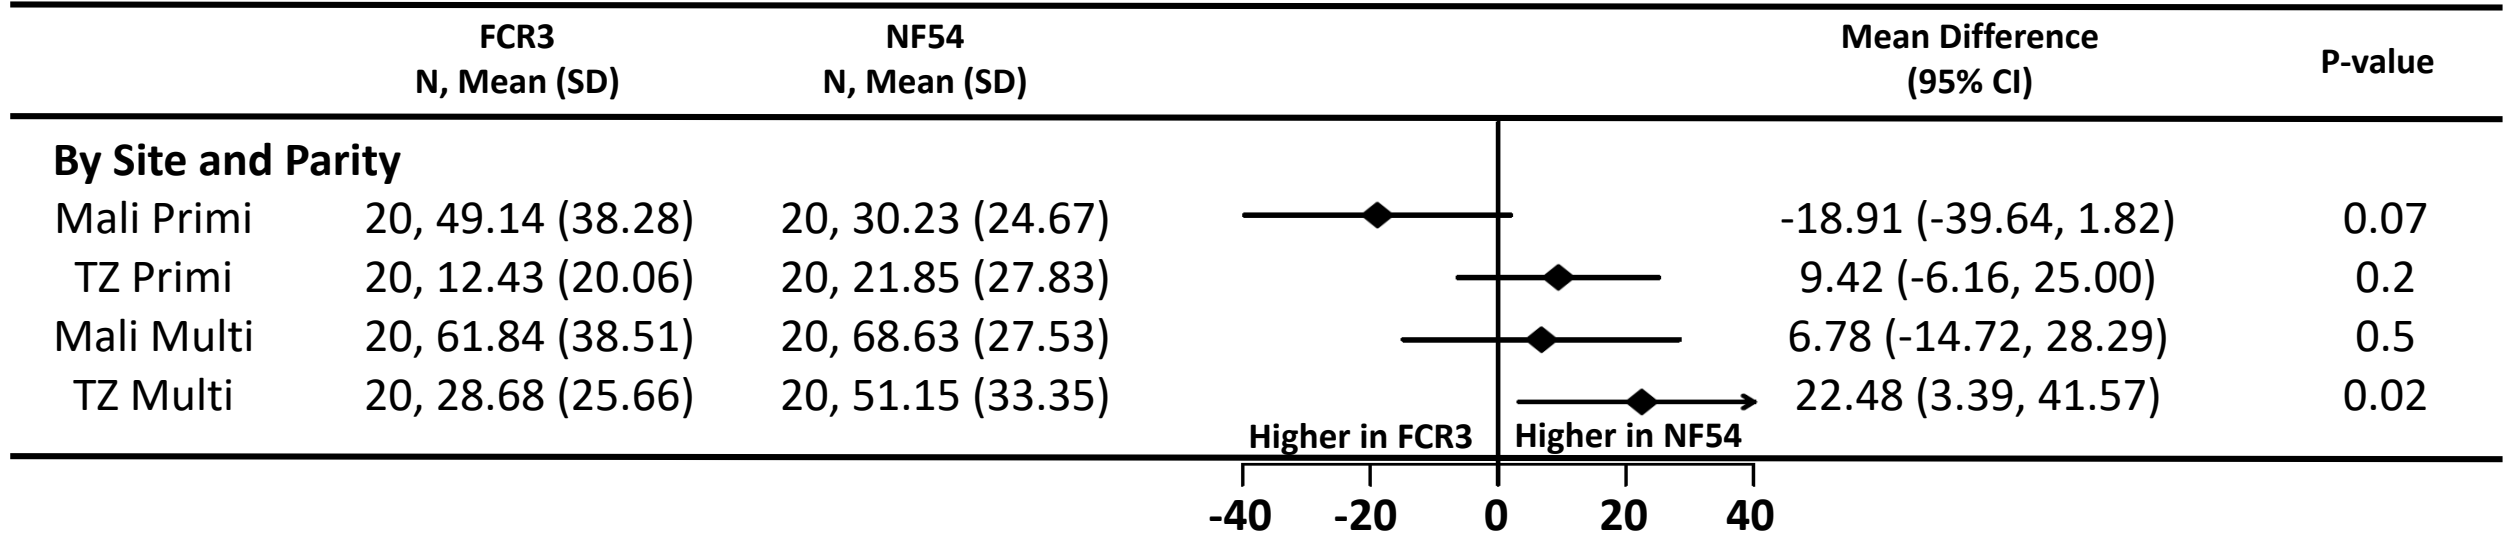

## B. Comparison of Opsonizing Activity

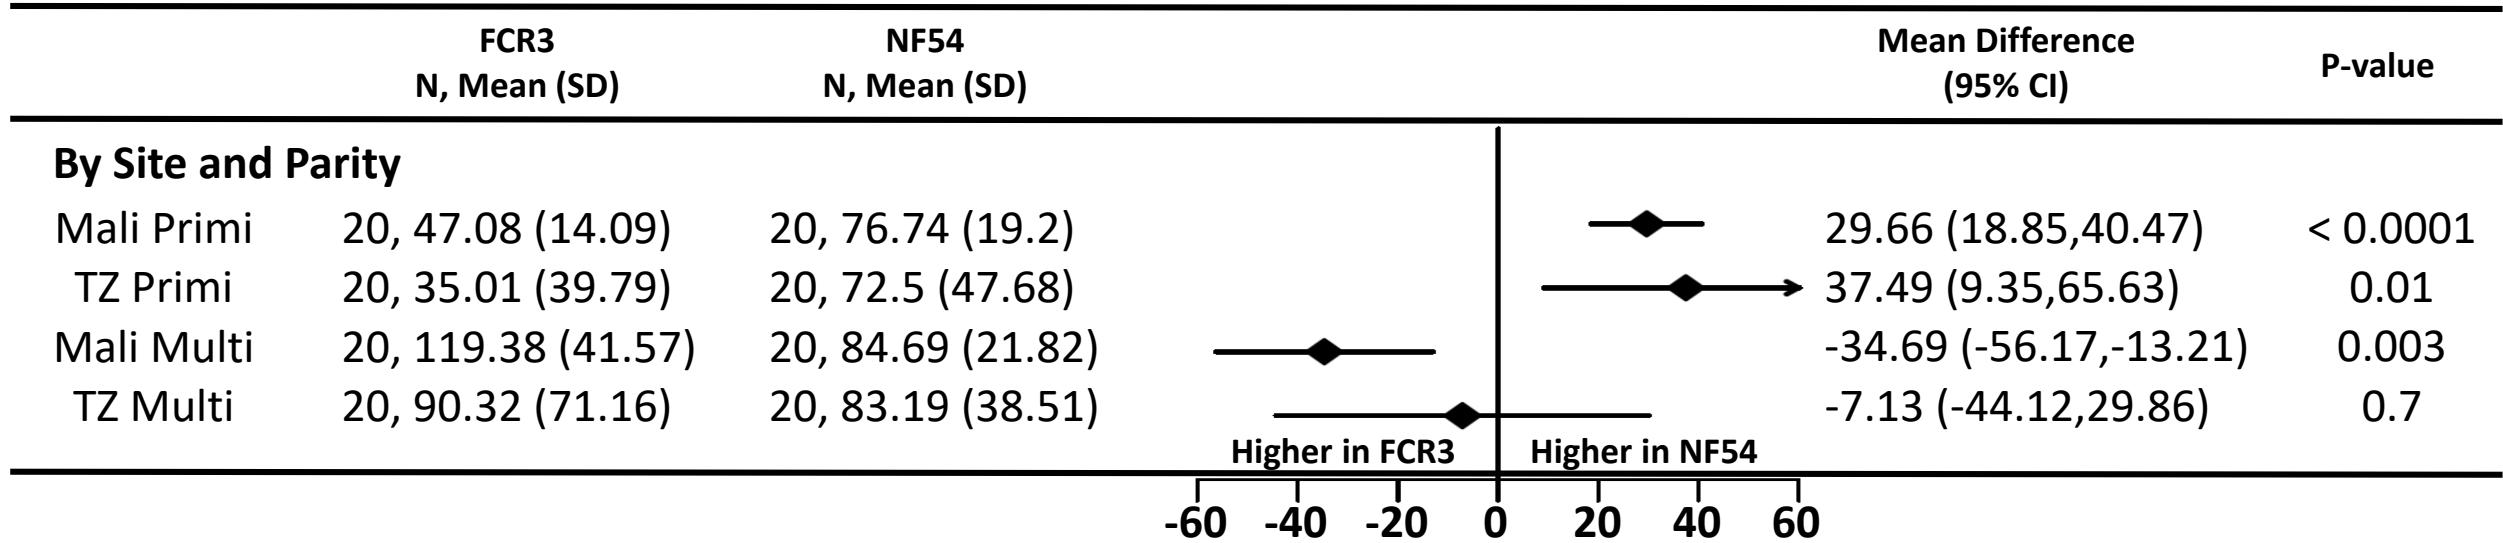

# Supplemental Figure 10

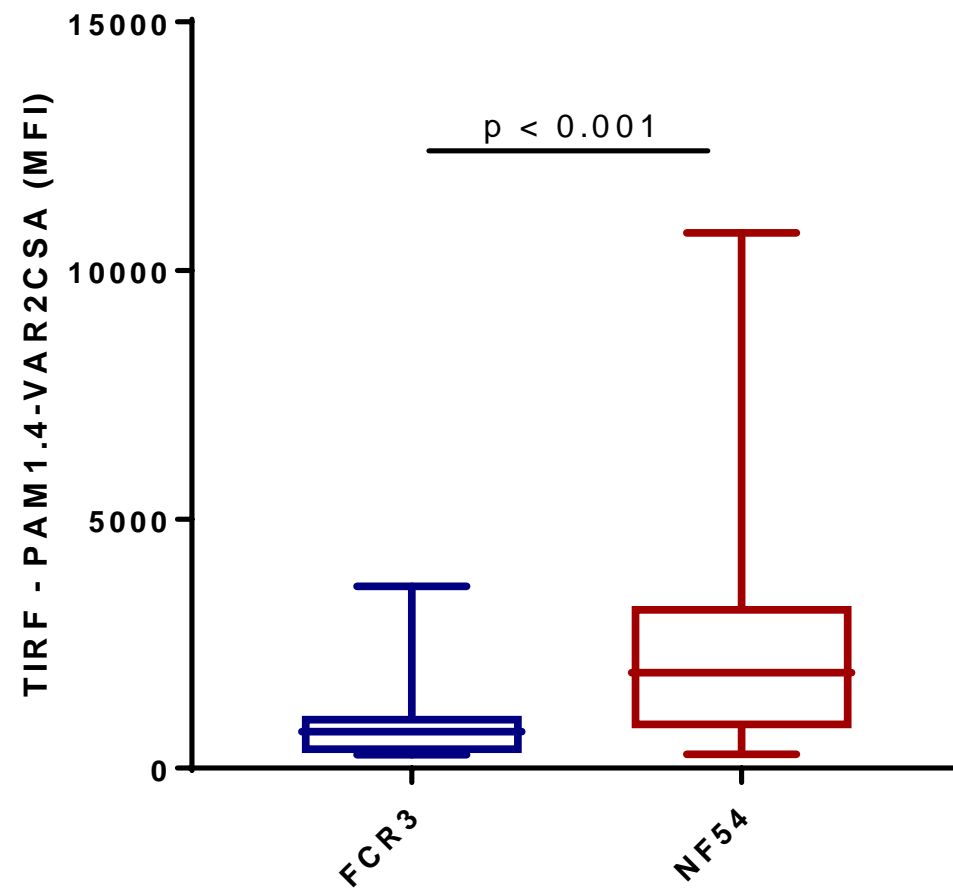

# Supplemental Figure 11

**A**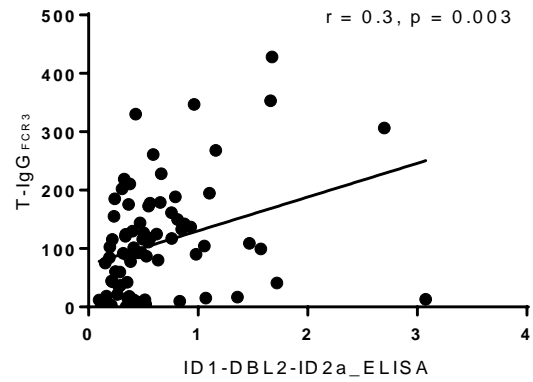**B**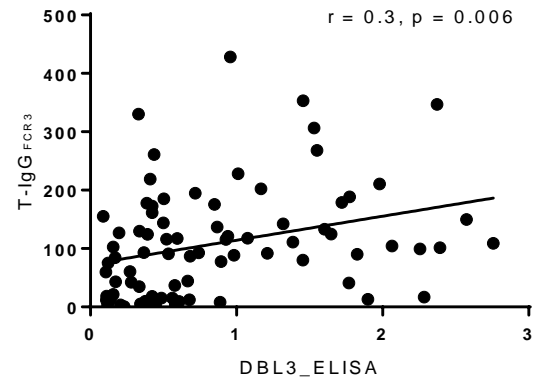**C**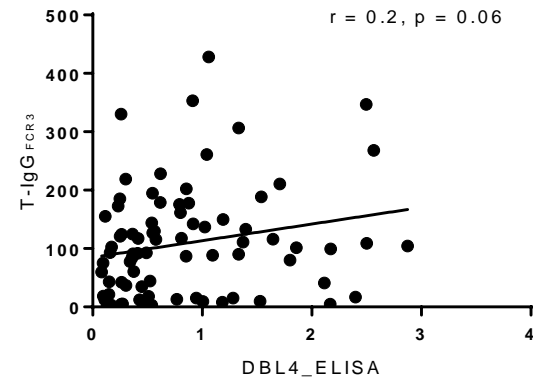**D**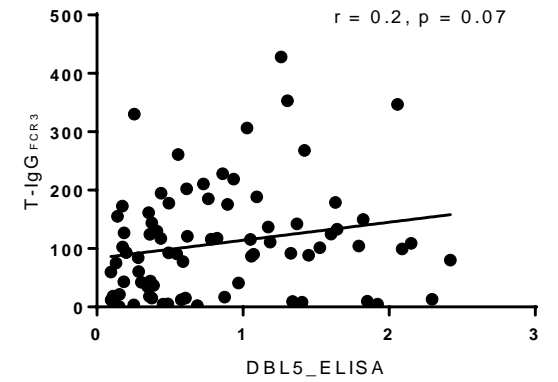**E**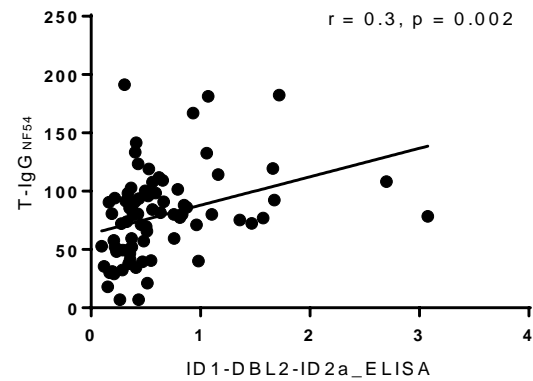**F**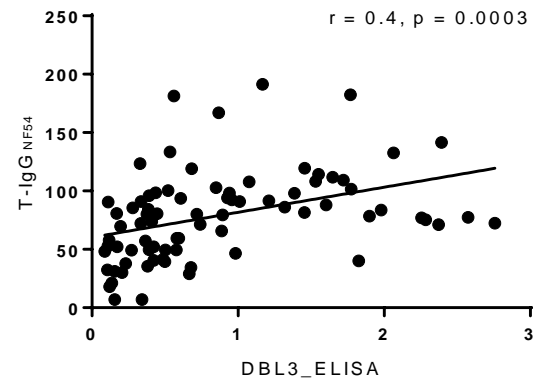**G**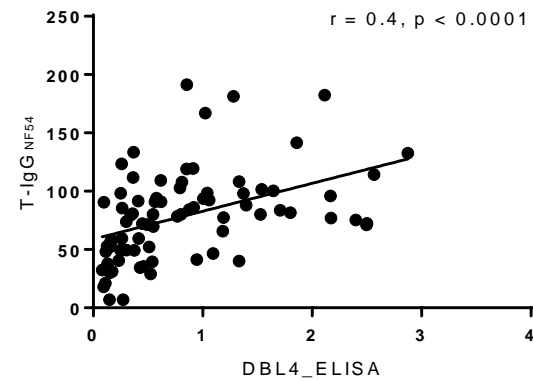**H**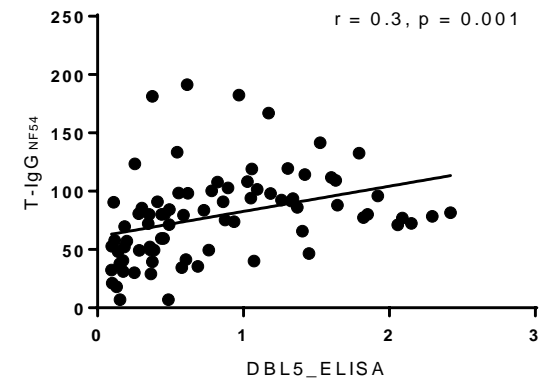

1 **Supplemental Figure Legends**

2 **Supplemental Figure 1. ELISA reactivity of plasma from Malian and Tanzanian pregnant**

3 **women to recombinant AMA-1.** (A) Site comparison of anti-AMA-1 antibody titer as optical

4 density (OD) units and a stratification by parity (B) are shown. Mann-Whitney test was

5 performed for significance and p-values are reported. Primi = Primigravid women; Multi =

6 multigravid women. Bars indicates the median.

7 **Supplemental Figure 2. Forest plot of mean difference for IgG reactivity to VAR2CSA**

8 **recombinants between pregnant women from Mali and Tanzania.** Mean difference with 95%

9 confidence interval (CI) of IgG reactivity to VAR2CSA in Mali and Tanzania is plotted. Primi =

10 Primigravid women; Multi = multigravid women; N = number of samples; SD = standard

11 deviation.

12 **Supplemental Figure 3. Surface expression of VAR2CSA by FCR3 and NF54 isolates.**

13 Magnetically enriched trophozoites/schizonts *P. falciparum* infected erythrocytes (IE) of (A)

14 FCR3 and (B) NF54 isolates were analysed by Flow cytometry for VAR2CSA expression on the

15 surface of the IE using PAM1.4 monoclonal antibody. Approximately 93% and 94%

16 respectively of FCR3 and NF54 IE expressed VAR2CSA as shown by proportion of PAM1.4

17 stained cells.

18 **Supplemental Figure 4. Plasma immunoglobulins reactivity on FCR3 and NF54 isolates.** In

19 multigravidae (multi) and primigravidae (primi), levels of immunoglobulins binding to both

20 parasites were analysed by Flow cytometry and compared. The comparisons of each

21 immunoglobulin type irrespective to the origin of the samples (panels A – E) and the stratified

22 analysis for Mali (panels **D – J**) and Tanzania (Tanz) (panels **H – O**) are shown. Mann-Whitney  
23 test was performed for significance and p-values are reported. Bars indicates the median.

24 **Supplemental Figure 5. Forest plot of mean difference for reactivity of plasma antibodies**  
25 **by parity, and stratified by immunoglobulin type and parasite variant.** Mean difference with  
26 95% confidence interval (CI) of different type immunoglobulin (Ig) reactivity to FCR3 and  
27 NF54 in primigravid and multigravid women analysed by Flow cytometry, is plotted. N =  
28 number of samples; SD = standard deviation.

29 **Supplemental Figure 6. Forest plot of mean difference for function of plasma antibodies by**  
30 **parity, and stratified by site and parasite variant.** Mean difference with 95% confidence  
31 interval (CI) of primigravid and multigravid women plasma blocking (**A**) and opsonizing (**B**)  
32 activities against FCR3 and NF54 parasites in Mali and Tanzania (Tanz) is plotted. N = number  
33 of samples; SD = standard deviation.

34 **Supplemental Figure 7. Function of plasma antibodies by parity and study sites.** The levels  
35 of Binding inhibition (rBIA) and opsonizing (rOA) activities of the plasma against the both  
36 parasites were assessed. Levels of rBIA in multigravidae (multi) and primigravidae (primi) from  
37 (**A**) Mali and (**B**) Tanzania as well as rOA of plasma from (**C**) Mali and (**D**) Tanzania are shown.  
38 Mann-Whitney test was performed for significance and p-values are reported. Bars indicates the  
39 median.

40 **Supplemental Figure 8. Forest plot of mean difference for reactivity of plasma antibodies**  
41 **by parasite variant, and stratified by immunoglobulin type and parity.** Mean difference with  
42 95% confidence interval (CI) of different type immunoglobulin (Ig) reactivity to FCR3 and  
43 NF54 parasites is plotted. Primi = Primigravid women; Multi = multigravid women; N = number  
44 of samples; SD = standard deviation.

45 **Supplemental Figure 9. Forest plot of mean difference for function of plasma antibodies by**  
46 **parasite variant, and stratified by site and parity.** Mean difference with 95% confidence  
47 interval (CI) of plasma blocking (A) and opsonizing (B) activities against FCR3 and NF54  
48 parasites in Mali and Tanzania (Tanz) is plotted. Primi = Primigravid women; Multi =  
49 multigravid women; N = number of samples; SD = standard deviation.

50 **Supplemental Figure 10. Surface expression of VAR2CSA measured by TIRF.** Horizontal  
51 lines indicate medians, boxes indicate interquartile ranges, and error bars indicate ranges. Mann-  
52 Whitney test was performed for significance and p-values are reported.

53 **Supplemental Figure 11. Correlation between antibodies binding to recombinant and**  
54 **native VAR2CSA antigens.** Relationships between the levels of IgG binding to surface antigens  
55 of CSA-binding FCR3 (A – D) and NF54 (E – H) IE measured by Flow cytometry and the level  
56 of IgG reactive to ID1-DBL2-ID2a, DBL3, DBL4 and DBL5 recombinants of VAR2CSA<sub>FCR3</sub>  
57 measured by ELISA are shown. Pearson's (r) coefficient of correlation and p-values are reported  
58 for each comparison.

59

**Supplemental Table 1: Power estimates for opsonizing and binding-inhibition assays**

|                         | Differences by Parity |       |       |                          |       |       | Differences by parasite variant |       |       |       |                          |       |       |       |
|-------------------------|-----------------------|-------|-------|--------------------------|-------|-------|---------------------------------|-------|-------|-------|--------------------------|-------|-------|-------|
|                         | Opsonizing Assay      |       |       | Binding-Inhibition assay |       |       | Opsonizing Assay                |       |       |       | Binding-Inhibition assay |       |       |       |
| <b>Number per group</b> | 40                    | 80    | 120   | 40                       | 80    | 120   | 40                              | 80    | 120   | 851   | 40                       | 80    | 120   | 1254  |
| <b>Mean Difference</b>  | 36.57                 | 36.57 | 36.57 | 23.26                    | 23.26 | 23.26 | -6.33                           | -6.33 | -6.33 | -6.33 | -3.87                    | -3.87 | -3.87 | -3.87 |
| <b>SD</b>               | 46.59                 | 46.59 | 46.59 | 34.54                    | 34.54 | 34.54 | 46.59                           | 46.59 | 46.59 | 46.59 | 34.54                    | 34.54 | 34.54 | 34.54 |
| <b>Alpha</b>            | 0.05                  | 0.05  | 0.05  | 0.05                     | 0.05  | 0.05  | 0.05                            | 0.05  | 0.05  | 0.05  | 0.05                     | 0.05  | 0.05  | 0.05  |
| <b>Power</b>            | 0.934                 | 0.999 | >.999 | 0.845                    | 0.989 | >.999 | 0.092                           | 0.137 | 0.182 | 0.8   | 0.078                    | 0.108 | 0.139 | 0.8   |

**Footnote:** For each marker, the power for observing a significant difference between primigravid and multigravid samples as well as the difference of those samples in assays comparing FCR3 vs. NF54 parasites, were calculated. This was run for the sample size in the current study, and the needed sample sizes to detect a meaningful difference (Power  $\geq$  0.8). The power is displayed at 40, 80, and 120 people per arm. If a marker did not achieve significance at 120 samples per arm, a row was added to calculate the sample size needed to achieve 0.80 power. SD = Standard Deviation
